# Supplementary material for: Elucidating white light emissions in Tm3+/Dy3+ codoped polyoxometalates: a color tuning and energy transfer mechanism study
Source: Royal Society of Chemistry journal article supplement (doi:10.1039/c8dt02671h), 2018-01-01
Supplement: c8dt02671h1.pdf [file c8dt02671h1.pdf]

Electronic Supporting Information

**Elucidating White Light-Emitting Emissions in Tm<sup>3+</sup>/Dy<sup>3+</sup> Codoped Polyoxometalates: a Color-Tunable and Energy Transfer Mechanism Study**

Hechen Wu, Minna Zhi, Vikram Singh, Huafeng Li, Pengtao Ma\* Jingyang Niu and Jingping Wang\*

*Henan Key Laboratory of Polyoxometalate Chemistry, Institute of Molecular and Crystal Engineering, College of Chemistry and Chemical Engineering, Henan University, Kaifeng, Henan 475004, P. R. China*

**Experimental section.**

**Synthesis of 2–8**

**Photoluminescence section**

**Tables**

**Table S1** The Calculated and Found Analyses of Tm and Dy in **1–8**.

**Table S2.** Selected bond angles (°) of **1**.

**Table S3.** Selected bond lengths (Å) of **1**.

**Figures**

**Fig. S1.** Thermogravimetric curves of spectra of **1–8**.

**Fig. S2.** IR spectra of **1–8**.

**Fig. S3.** EDX elemental spectra of **1–8** showing the presence of C, N, O, P, K, W, Tm and Dy element in the lattice.

**Fig S4.** The packing arrangement of **1**.

**Fig. S5.** STEM-EDX element maps of **1**.

**Fig. S6.** STEM-EDX element maps of **2**.

**Fig. S7.** (a) The PL emission spectra of **1** ( $\lambda_{\text{ex}} = 360$  nm); (b) the PL emission spectra of **2** ( $\lambda_{\text{ex}} = 367$  nm).

**Fig S8.** (a) The PL excitation spectra of **1** ( $\lambda_{\text{em}} = 452$  nm); (b) the PL excitation spectra of **2** ( $\lambda_{\text{em}} = 573$  nm).

**Fig S9.** The PL emission spectra of  $[\text{P}_2\text{W}_{19}\text{O}_{67}(\text{H}_2\text{O})]^{14-}$  ( $\lambda_{\text{ex}} = 360$  nm).

**Fig S10.** CIE chromaticity diagram of **1** and **2**.

**Fig S11.** The time resolved emission spectroscopy of **1** ( $\lambda_{\text{ex}} = 360$  nm).

**Fig S12.** The time resolved emission spectroscopy of **2** ( $\lambda_{\text{ex}} = 360$  nm).

**Fig S13.** The PL decay curve of Tm<sup>3+</sup> centre in **1, 3–8** ( $\lambda_{\text{ex}} = 360$  nm,  $\lambda_{\text{em}} = 452$  nm).

## Experimental section

### Synthesis of 2

DyCl<sub>3</sub>·6H<sub>2</sub>O (0.228 g, 0.605 mmol) was dissolved in 30 mL of deionized water, and then tartaric acid (0.120 g, 0.800 mmol) and precursor K<sub>14</sub>[P<sub>2</sub>W<sub>19</sub>O<sub>69</sub>(H<sub>2</sub>O)]·24H<sub>2</sub>O (2.120 g, 0.465 mmol) were added step by step with stirring. The pH value of mixture solution was adjusted to approximately 3.2 by 3 M KOH solution and heated to 60 °C for 1.5 h. Subsequently, tetramethyl ammonium chloride (TMACl) (0.110 g, 1.000 mmol) was added and stirred for another 30 min. The resulting solution was cooled to room temperature and filtered to evaporate for two weeks to obtain colourless block crystals at room temperature.

### Synthesis of 3 (Tm<sup>3+</sup>:Dy<sup>3+</sup> = 0.97:0.03)

TmCl<sub>3</sub>·6H<sub>2</sub>O (0.221 g, 0.576 mmol) and DyCl<sub>3</sub>·6H<sub>2</sub>O (0.007 g, 0.019 mmol) were dissolved in 30 mL of deionized water, and then tartaric acid (0.120 g, 0.800 mmol) and precursor K<sub>14</sub>[P<sub>2</sub>W<sub>19</sub>O<sub>69</sub>(H<sub>2</sub>O)]·24H<sub>2</sub>O (2.120 g, 0.465 mmol) were added step by step with stirring. The pH value of mixture solution was adjusted to approximately 3.2 by 3 M KOH solution and heated to 60 °C for 1.5 h. Subsequently, tetramethyl ammonium chloride (TMACl) (0.110 g, 1.000 mmol) was added and stirred for another 30 min. The resulting solution was cooled to room temperature and filtered to evaporate for two weeks to obtain colorless block crystals at room temperature.

### Synthesis of 4 (Tm<sup>3+</sup>:Dy<sup>3+</sup> = 0.92:0.08)

TmCl<sub>3</sub>·6H<sub>2</sub>O (0.210 g, 0.547 mmol) and DyCl<sub>3</sub>·6H<sub>2</sub>O (0.018 g, 0.048 mmol) were dissolved in 30 mL of deionized water, and then tartaric acid (0.120 g, 0.800 mmol) and precursor K<sub>14</sub>[P<sub>2</sub>W<sub>19</sub>O<sub>69</sub>(H<sub>2</sub>O)]·24H<sub>2</sub>O (2.120 g, 0.465 mmol) were added step by step with stirring. The pH value of mixture solution was adjusted to approximately 3.2 by 3 M KOH solution and heated to 60 °C for 1.5 h. Subsequently, tetramethyl ammonium chloride (TMACl) (0.110 g, 1.000 mmol) was added and stirred for another 30 min. The resulting solution was cooled to room temperature and filtered to evaporate for two weeks to obtain colorless block crystals at room temperature.

### Synthesis of 5 (Tm<sup>3+</sup>:Dy<sup>3+</sup> = 0.90:0.10)

TmCl<sub>3</sub>·6H<sub>2</sub>O (0.205 g, 0.534 mmol) and DyCl<sub>3</sub>·6H<sub>2</sub>O (0.023 g, 0.061 mmol) were dissolved in 30 mL of deionized water, and then tartaric acid (0.120 g, 0.800 mmol) and precursor K<sub>14</sub>[P<sub>2</sub>W<sub>19</sub>O<sub>69</sub>(H<sub>2</sub>O)]·24H<sub>2</sub>O (2.120 g, 0.465 mmol) were added step by step with stirring. The pH value of mixture solution was adjusted to approximately 3.2 by 3 M KOH solution and heated to 60 °C for 1.5 h. Subsequently, tetramethyl ammonium chloride (TMACl) (0.110 g, 1.000 mmol) was added and stirred for another 30 min. The resulting solution was cooled to room temperature and filtered to evaporate for two weeks to obtain colorless block crystals at room temperature.

### Synthesis of 6 (Tm<sup>3+</sup>:Dy<sup>3+</sup> = 0.80:0.20)

TmCl<sub>3</sub>·6H<sub>2</sub>O (0.182 g, 0.475 mmol) and DyCl<sub>3</sub>·6H<sub>2</sub>O (0.046 g, 0.122 mmol) were dissolved in 30 mL of deionized water, and then tartaric acid (0.120 g, 0.800 mmol) and precursor K<sub>14</sub>[P<sub>2</sub>W<sub>19</sub>O<sub>69</sub>(H<sub>2</sub>O)]·24H<sub>2</sub>O (2.120 g, 0.465 mmol) were added step by step with stirring. The pH value of mixture solution was adjusted to approximately 3.2 by 3 M KOH solution and heated to 60 °C for 1.5 h. Subsequently, tetramethyl ammonium chloride (TMACl) (0.110 g,

1.000 mmol) was added and stirred for another 30 min. The resulting solution was cooled to room temperature and filtered to evaporate for two weeks to obtain colorless block crystals at room temperature.

**Synthesis of 7** (Tm<sup>3+</sup>:Dy<sup>3+</sup> = 0.75:0.25)

TmCl<sub>3</sub>·6H<sub>2</sub>O (0.171 g, 0.446 mmol) and DyCl<sub>3</sub>·6H<sub>2</sub>O (0.057 g, 0.151 mmol) were dissolved in 30 mL of deionized water, and then tartaric acid (0.120 g, 0.800 mmol) and precursor K<sub>14</sub>[P<sub>2</sub>W<sub>19</sub>O<sub>69</sub>(H<sub>2</sub>O)]·24H<sub>2</sub>O (2.120 g, 0.465 mmol) were added step by step with stirring. The pH value of mixture solution was adjusted to approximately 3.2 by 3 M KOH solution and heated to 60 °C for 1.5 h. Subsequently, tetramethyl ammonium chloride (TMACl) (0.110 g, 1.000 mmol) was added and stirred for another 30 min. The resulting solution was cooled to room temperature and filtered to evaporate for two weeks to obtain colorless block crystals at room temperature.

**Synthesis of 8** (Tm<sup>3+</sup>:Dy<sup>3+</sup> = 0.50:0.50)

TmCl<sub>3</sub>·6H<sub>2</sub>O (0.114 g, 0.297 mmol) and DyCl<sub>3</sub>·6H<sub>2</sub>O (0.114 g, 0.302 mmol) were dissolved in 30 mL of deionized water, and then tartaric acid (0.120 g, 0.800 mmol) and precursor K<sub>14</sub>[P<sub>2</sub>W<sub>19</sub>O<sub>69</sub>(H<sub>2</sub>O)]·24H<sub>2</sub>O (2.120 g, 0.465 mmol) were added step by step with stirring. The pH value of mixture solution was adjusted to approximately 3.2 by 3 M KOH solution and heated to 60 °C for 1.5 h. Subsequently, tetramethyl ammonium chloride (TMACl) (0.110 g, 1.000 mmol) was added and stirred for another 30 min. The resulting solution was cooled to room temperature and filtered to evaporate for two weeks to obtain colorless block crystals at room temperature.

**Photoluminescence section**

The CIE 1931 chromaticity coordinates, color purity, and CCT are important optical parameters in research of PL properties of luminescent complexes. The CCT can be calculated by the following equations (1):

$$n = (x - x_e)/(y_e - y)$$

$$CCT = 499.0n^3 + 3525.0n^2 + 6823.3n + 5520.22 \quad (1)$$

Where  $x_e = 0.3320$ ;  $y_e = 0.1858$ ;  $x, y$  are the CIE 1931 chromaticity coordinates.

The lifetime adheres to a double exponential decay mode, which can be fitted with the formulae (2):

$$I(t) = A_1 e^{\left(-\frac{t}{\tau_1}\right)} + A_2 e^{\left(-\frac{t}{\tau_2}\right)} \quad (2)$$

Where  $I(t)$  represents the emission intensity at time  $t$ ,  $A_1$  and  $A_2$  represent weighting parameters;  $\tau_1$  and  $\tau_2$  represent short time and long time component. The double decay time may be the two emitting Tm<sup>3+</sup> centres with different coordinated configurations. In generally, the average lifetime  $\tau$  could be regarded as experimental lifetime value and be calculated by the following formulae (3):

$$\tau^* = \frac{A_1\tau_1^2 + A_2\tau_2^2}{A_1\tau_1 + A_2\tau_2} \quad (3)$$

**Table S1** The Calculated and Found Analyses of Tm and Dy in 1–8.

| Sample | Calcd |       | Found |       |
|--------|-------|-------|-------|-------|
|        | Tm(%) | Dy(%) | Tm(%) | Dy(%) |
| 1      | 4.81  | 0     | 4.80  |       |
| 2      | 0     | 4.64  |       | 4.69  |
| 3      | 4.67  | 0.14  | 4.71  | 0.08  |
| 4      | 4.43  | 0.37  | 4.60  | 0.24  |
| 5      | 4.33  | 0.46  | 4.26  | 0.36  |
| 6      | 3.85  | 0.93  | 3.67  | 0.74  |
| 7      | 3.61  | 1.16  | 3.51  | 1.06  |
| 8      | 2.32  | 2.41  | 2.21  | 2.18  |

**Table S2.** Selected bond angles (°) of 1.

| Bond        | Angel     | Bond        | Angel     |
|-------------|-----------|-------------|-----------|
| O23–Tm1–O29 | 77.3(11)  | O15–Tm2–O40 | 76.9(8)   |
| O23–Tm1–O36 | 74.3(10)  | O15–Tm2–O74 | 72.4(10)  |
| O23–Tm1–O46 | 123.2(10) | O15–Tm2–O86 | 133.9(10) |
| O23–Tm1–O81 | 71.7(10)  | O15–Tm2–O88 | 80.2(12)  |
| O23–Tm1–O83 | 138.8(11) | O40–Tm2–O74 | 138.7(9)  |
| O23–Tm1–O85 | 139.6(11) | O40–Tm2–O86 | 72.2(9)   |
| O23–Tm1–O89 | 78.2(10)  | O40–Tm2–O88 | 76.6(12)  |
| O29–Tm1–O36 | 121.3(12) | O42–Tm2–O15 | 126.1(11) |
| O29–Tm1–O46 | 75.1(10)  | O42–Tm2–O40 | 81.0(9)   |
| O29–Tm1–O81 | 77.3(11)  | O42–Tm2–O43 | 73.5(10)  |
| O29–Tm1–O83 | 76.9(13)  | O42–Tm2–O74 | 139.9(9)  |
| O29–Tm1–O89 | 140.5(11) | O42–Tm2–O86 | 81.7(11)  |
| O36–Tm1–O46 | 79.4(10)  | O42–Tm2–O87 | 80.0(12)  |
| O36–Tm1–O81 | 138.1(10) | O42–Tm2–O88 | 140.0(12) |
| O36–Tm1–O83 | 146.9(12) | O43–Tm2–O15 | 78.6(10)  |
| O36–Tm1–O89 | 80.4(11)  | O43–Tm2–O40 | 123.0(10) |
| O46–Tm1–O81 | 140.7(10) | O43–Tm2–O74 | 77.1(10)  |
| O83–Tm1–O46 | 79.7(12)  | O43–Tm2–O86 | 147.3(11) |
| O83–Tm1–O81 | 70.6(12)  | O43–Tm2–O87 | 79.3(12)  |
| O83–Tm1–O89 | 102.9(12) | O43–Tm2–O88 | 146.2(12) |
| O85–Tm1–O29 | 142.9(12) | O74–Tm2–O88 | 71.5(12)  |
| O85–Tm1–O36 | 77.8(11)  | O86–Tm2–O74 | 111.5(11) |
| O85–Tm1–O46 | 78.4(11)  | O86–Tm2–O88 | 60.1(13)  |
| O85–Tm1–O81 | 115.0(12) | O87–Tm2–O15 | 138.1(11) |

|             |           |             |           |
|-------------|-----------|-------------|-----------|
| O85-Tm1-O83 | 73.1(12)  | O87-Tm2-O40 | 144.5(10) |
| O85-Tm1-O89 | 68.8(12)  | O87-Tm2-O74 | 68.1(12)  |
| O89-Tm1-O46 | 144.4(10) | O87-Tm2-O86 | 75.6(12)  |
| O89-Tm1-O81 | 69.4(11)  | O87-Tm2-O88 | 99.9(14)  |
| W4-O23-Tm1  | 138.4(15) | W12-O40-Tm2 | 134.2(11) |
| W7-O29-Tm1  | 154.9(18) | W14-O42-Tm2 | 157.2(16) |
| W19-O36-Tm1 | 142.7(18) | W5-O43-Tm2  | 158.7(16) |
| W11-O46-Tm1 | 157.1(14) | W6-O15-Tm2  | 136.8(14) |

**Table S3.** Selected bond lengths (Å) of **1**.

| Bond    | Length  | Bond    | Length  |
|---------|---------|---------|---------|
| Tm1-O23 | 2.32(3) | Tm2-O15 | 2.25(2) |
| Tm1-O29 | 2.31(3) | Tm2-O40 | 2.34(2) |
| Tm1-O36 | 2.28(3) | Tm2-O42 | 2.29(4) |
| Tm1-O46 | 2.26(3) | Tm2-O43 | 2.25(3) |
| Tm1-O81 | 2.48(3) | Tm2-O74 | 2.43(3) |
| Tm1-O83 | 2.35(4) | Tm2-O86 | 2.40(3) |
| Tm1-O85 | 2.39(4) | Tm2-O87 | 2.26(4) |
| Tm1-O89 | 2.43(3) | Tm2-O88 | 2.41(4) |

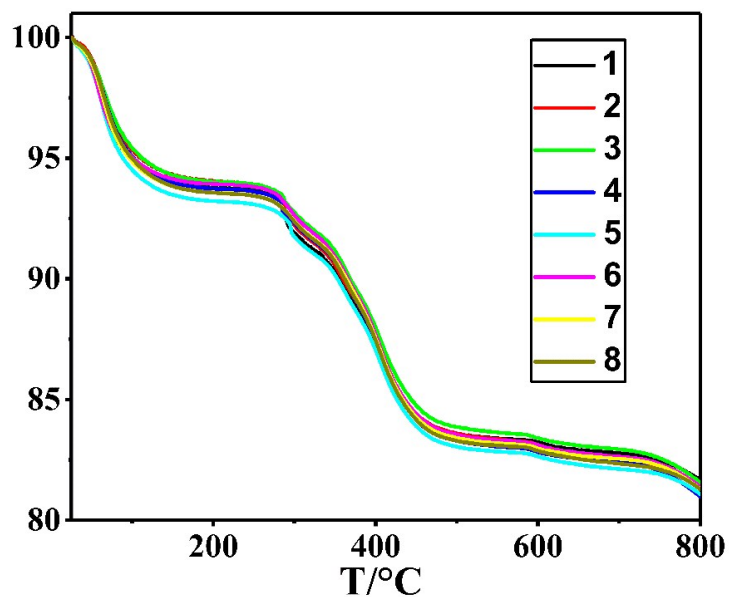

**Fig. S1.** Thermogravimetric curves of spectra of **1-8**.

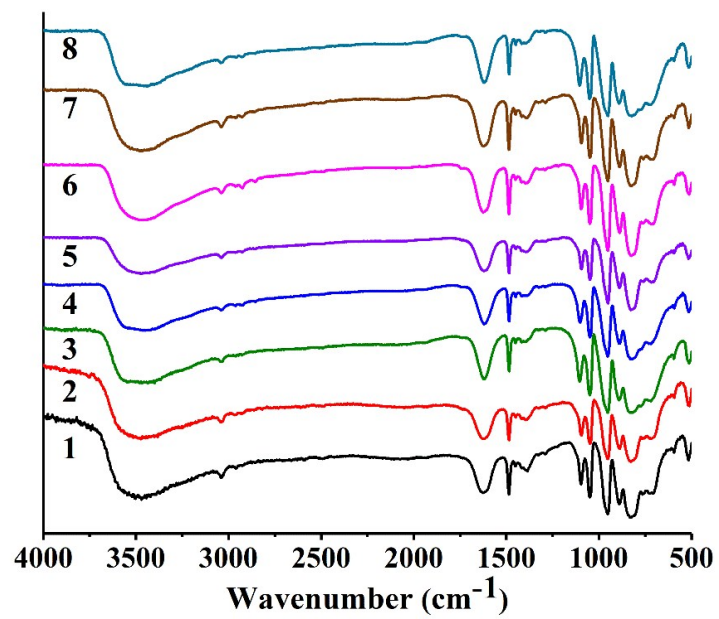

Fig. S2. IR spectra of 1–8.

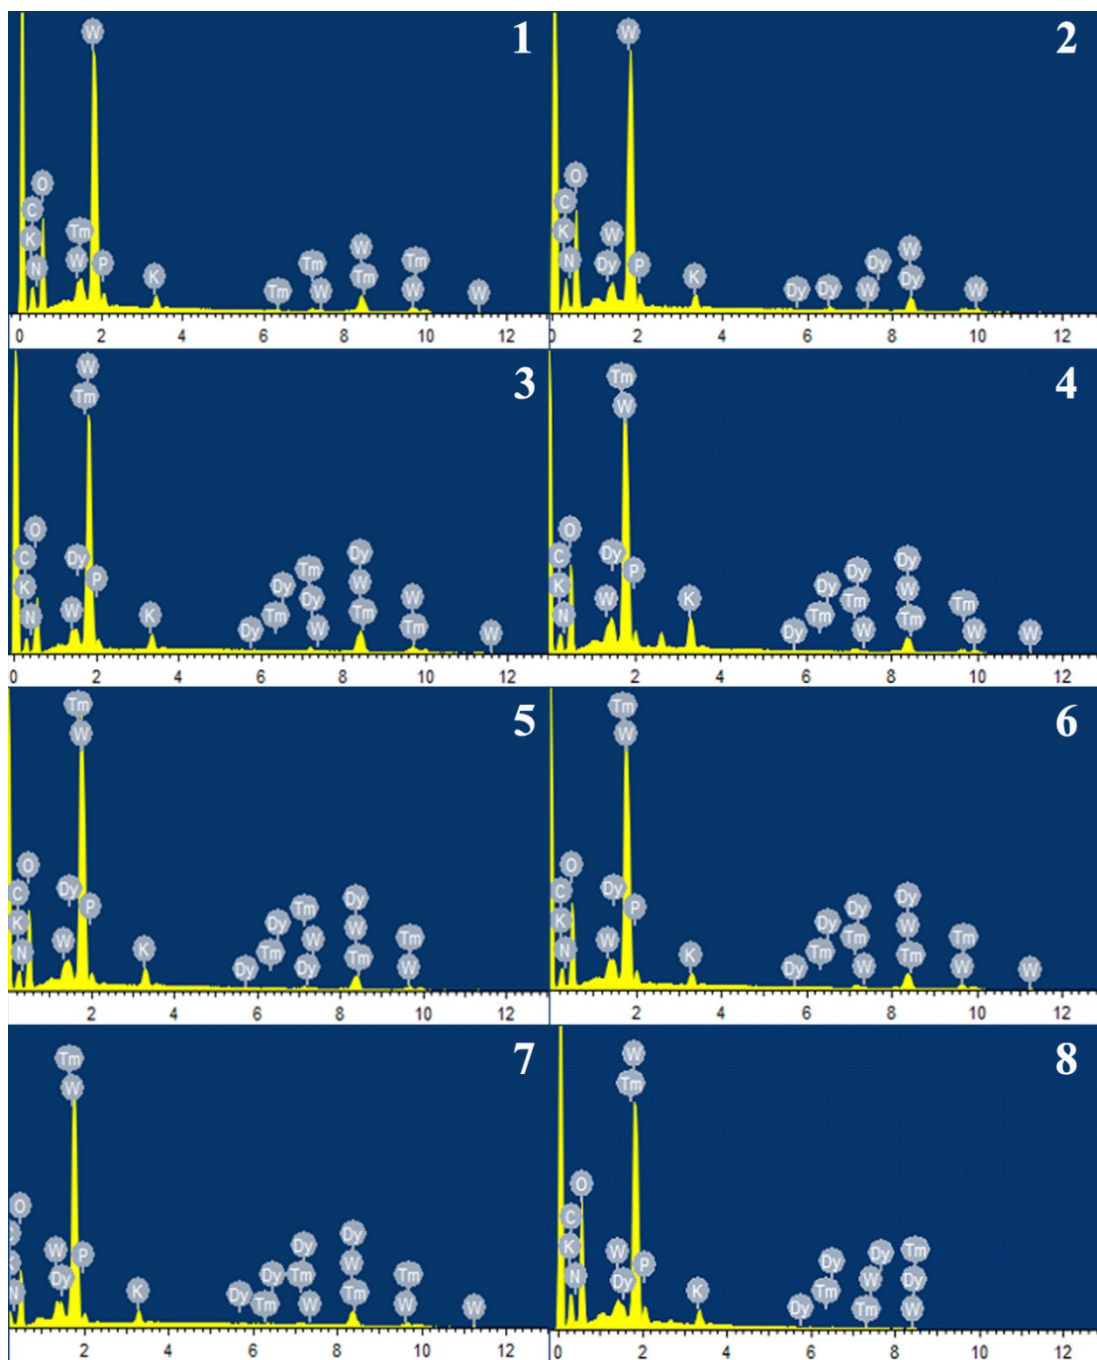

**Fig. S3.** EDX elemental spectra of **1–8** showing the presence of C, N, O, P, K, W, Tm and Dy element in the lattice. The measured ratios of  $\text{Tm}^{3+}/\text{Dy}^{3+}$  ions are almost consistent with nominal ratios.

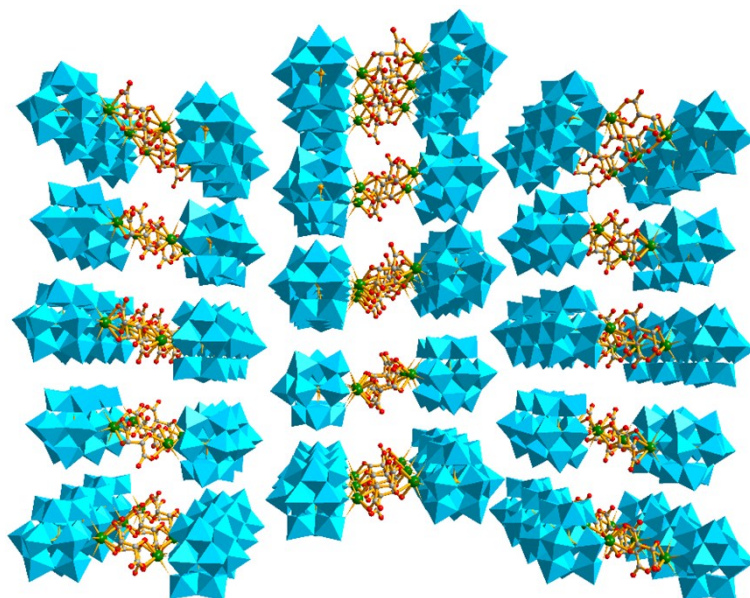

**Fig S4.** The packing arrangement of polyanions of **1**. (Color code:  $\text{WO}_6$ , sky blue; P, pink; Tm, green; O, red; C, gray)

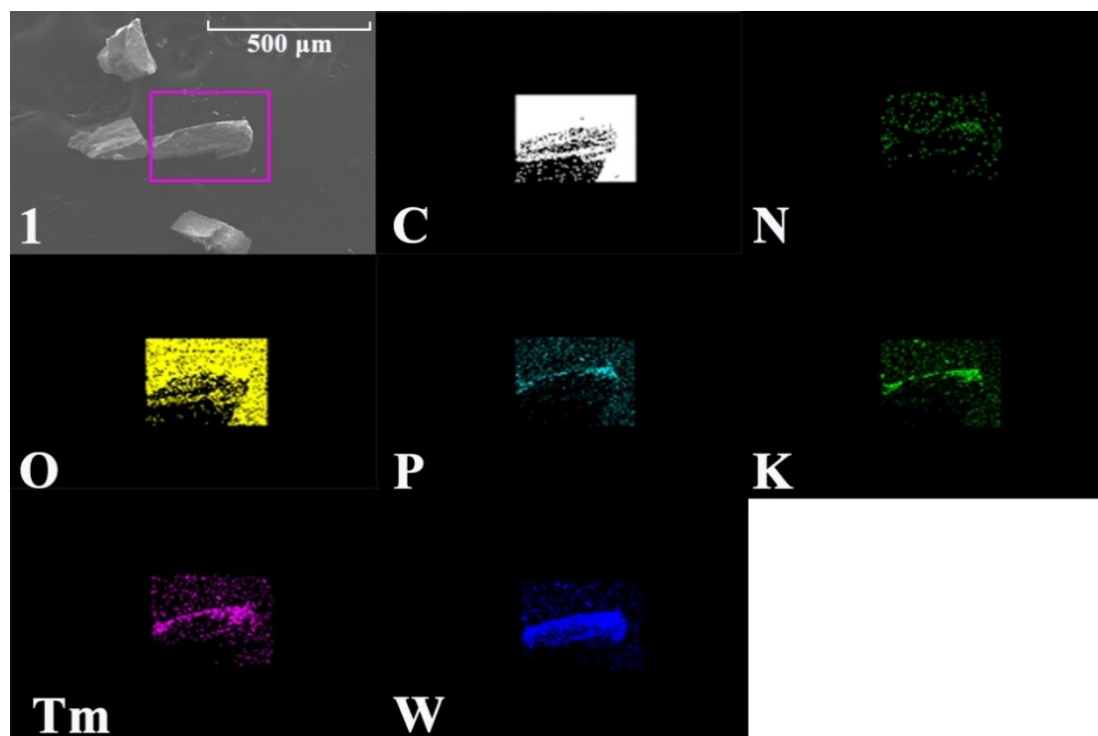

**Fig. S5.** STEM-EDX element maps of **1**.



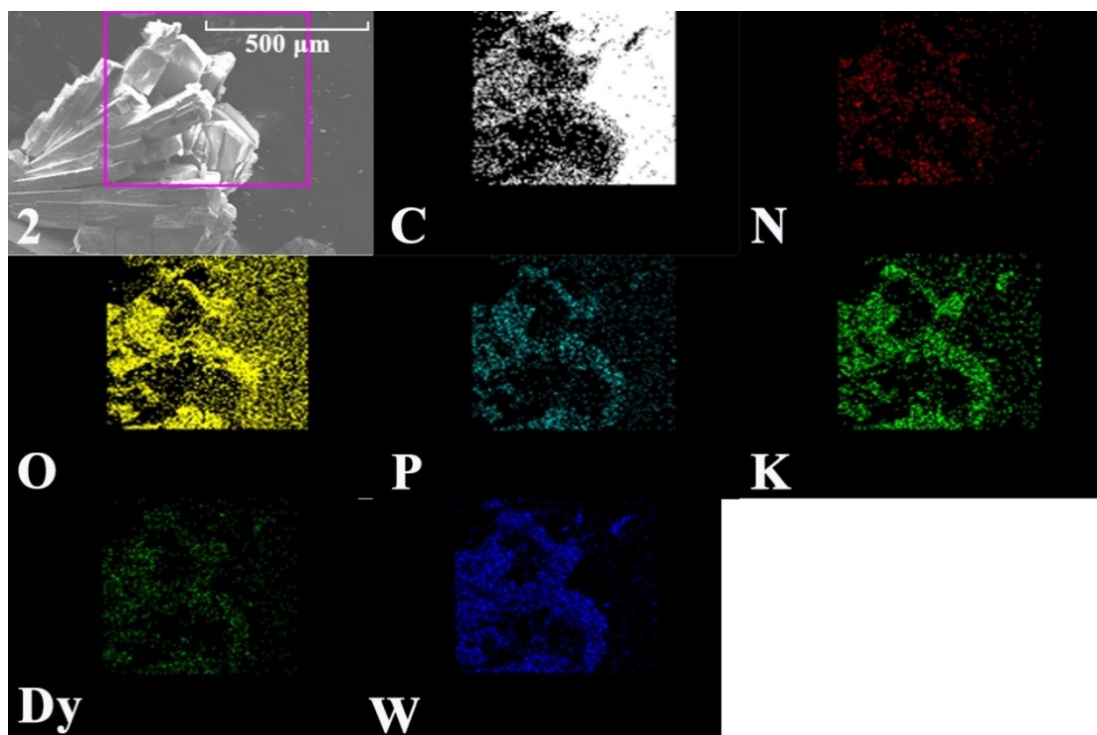

Fig. S6. STEM-EDX element maps of **2**.

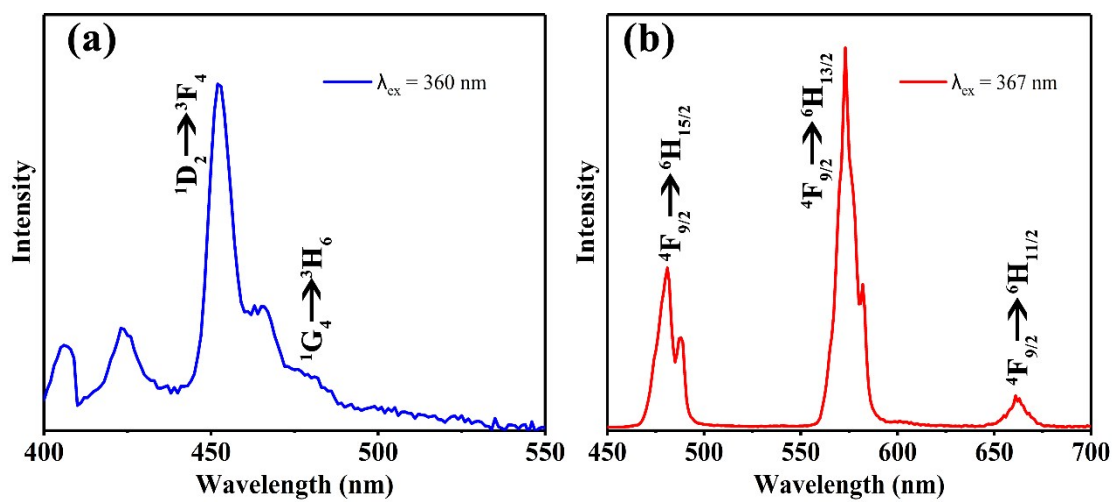

Fig. S7. (a) The PL emission spectra of **1** ( $\lambda_{\text{ex}} = 360$  nm); (b) the PL emission spectra of **2** ( $\lambda_{\text{ex}} = 367$  nm).

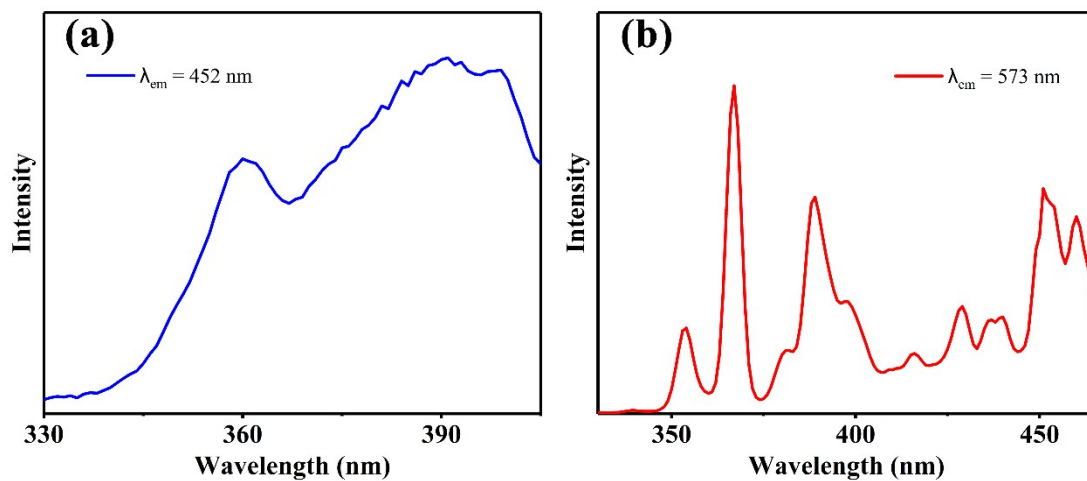

**Fig S8.** (a) The PL excitation spectra of **1** ( $\lambda_{em} = 452$  nm); (b) the PL excitation spectra of **2** ( $\lambda_{em} = 573$  nm).

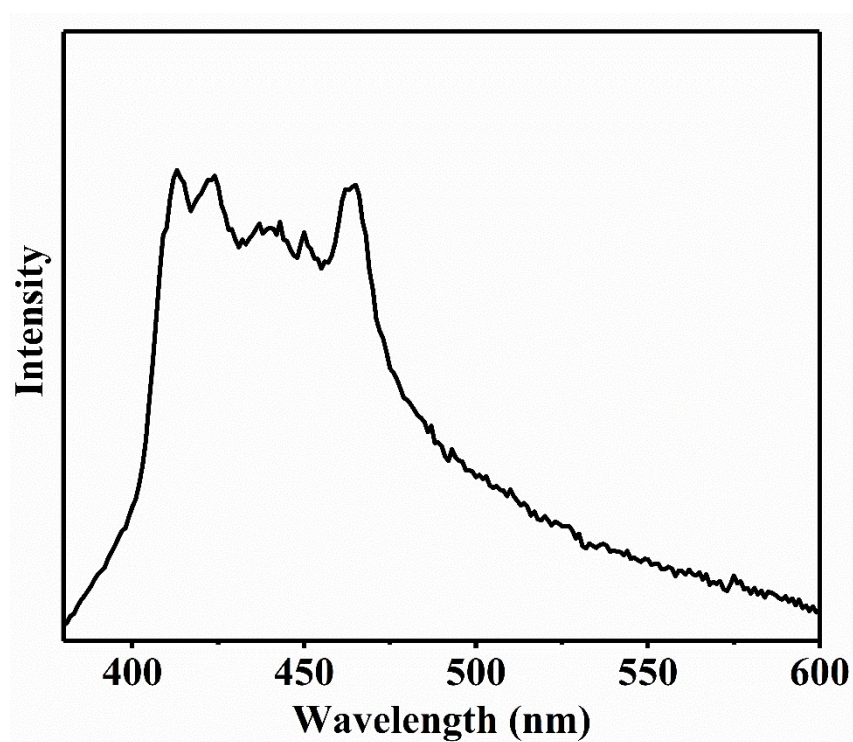

**Fig S9.** The PL emission spectra of  $K_{14}[P_2W_{19}O_{69}(H_2O)] \cdot 24H_2O$  ( $\lambda_{ex} = 360$  nm).

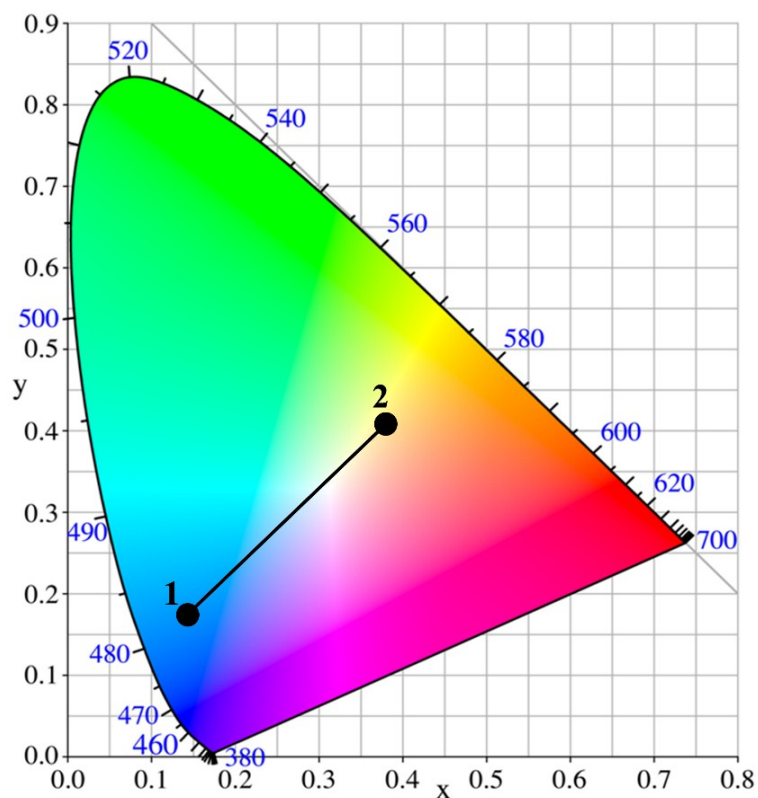

Fig S10. CIE chromaticity diagram of **1** and **2**.

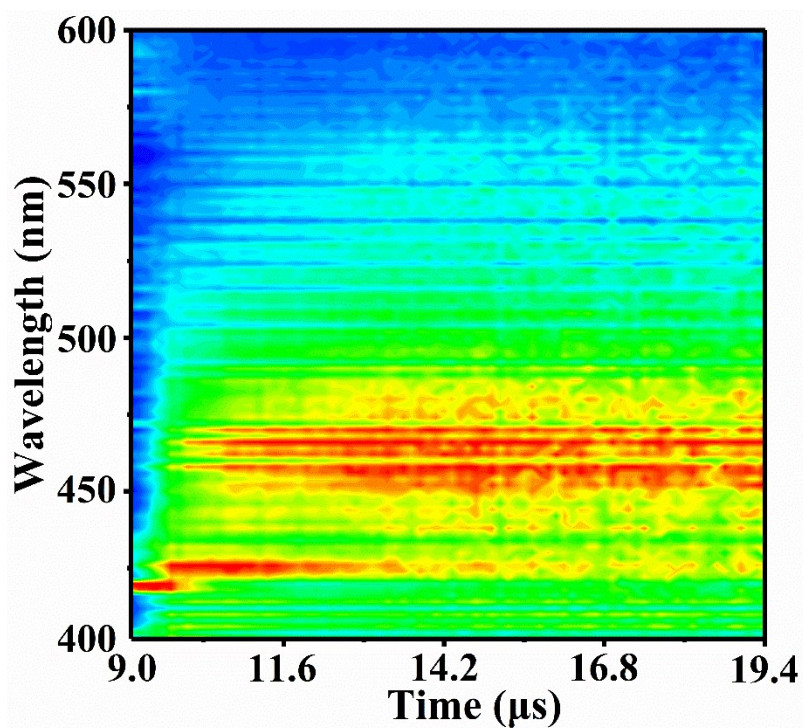

Fig S11. The time resolved emission spectroscopy of **1** ( $\lambda_{\text{ex}} = 360$  nm).

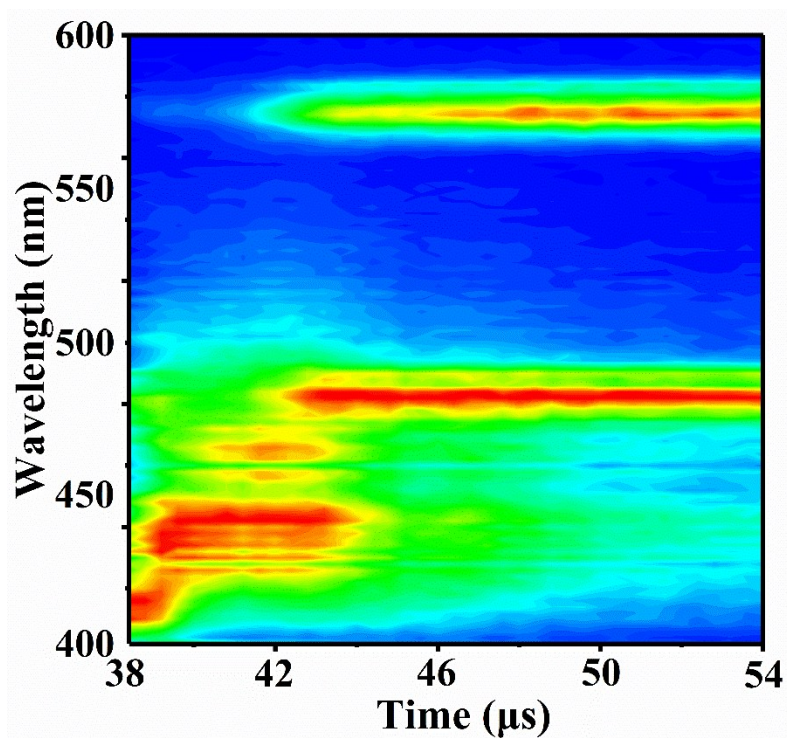

Fig S12. The time resolved emission spectroscopy of **2** ( $\lambda_{\text{ex}} = 360$  nm).

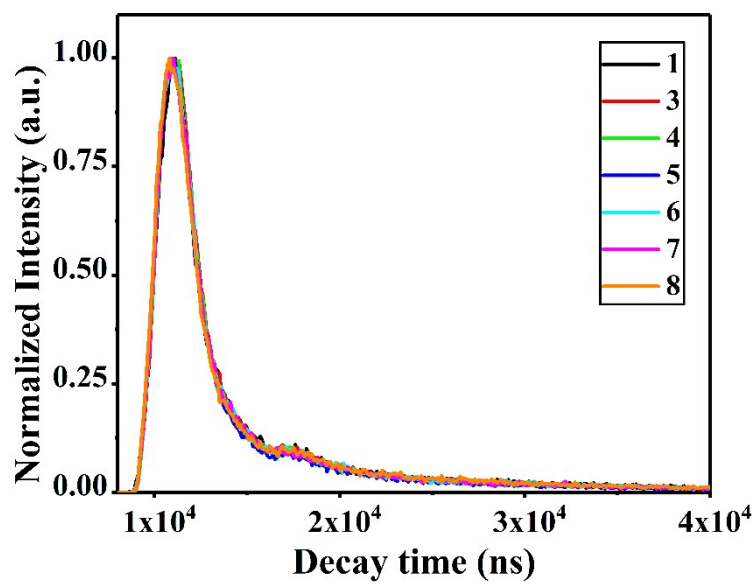

Fig S13. The PL decay curve of  $\text{Tm}^{3+}$  centre in **1, 3-8** ( $\lambda_{\text{ex}} = 360$  nm,  $\lambda_{\text{em}} = 452$  nm).
